# Supplementary material for: Peculiarities of the Spatial and Electronic Structure of 2-Aryl-1,2,3-Triazol-5-Carboxylic Acids and Their Salts on the Basis of Spectral Studies and DFT Calculations
Source: MDPI journal article supplement (doi:10.3390/ijms241814001), 2023-09-12
Supplement: s1 [file s1]

## SUPPLEMENTARY MATERIAL

# Peculiarities of the Spatial and Electronic Structure of 2-Aryl-1,2,3-Triazol-5-Carboxylic Acids and Their Salts on the Basis of Spectral Studies and DFT Calculations

Mauricio Alcolea Palafox <sup>1,\*</sup>, Nataliya P. Belskaya <sup>2</sup> and Irena P. Kostova <sup>3</sup>

<sup>1</sup> Departamento de Química Física, Facultad de Ciencias Químicas, Universidad Complutense, 28040 Madrid, Spain

<sup>2</sup> Department of Technology for Organic Synthesis, Ural Federal University, 19 Mira Str., 620012 Yekaterinburg, Russia; n.p.belskaya@urfu.ru

<sup>3</sup> Department of Chemistry, Faculty of Pharmacy, Medical University, 2 Dunav Str., 1000 Sofia, Bulgaria; irenakostova@yahoo.com

\* Correspondence: alcolea@ucm.es

---

## 2.6 Vibrational Analysis of **1a** and **2a**

*The C=O modes:* The C=O out-of-plane bending is predicted (scaled) with medium-weak IR intensity in the monomer form at 705 cm<sup>-1</sup>, and strongly coupled to  $\gamma(\text{NCC})+\gamma(\text{CN})$  modes. A large contribution of this mode was also predicted at 770 cm<sup>-1</sup>. However, in the dimer form it is predicted with almost null IR and Raman intensity which difficult its determination in the spectra. The very low experimental IR band at 707.8 cm<sup>-1</sup> and the weak Raman line at 705.9 cm<sup>-1</sup> were assigned to this mode.

### 2.6.4 The aryl ring modes

The aromatic C-H stretching vibrations are generally observed in the 3200-3050 cm<sup>-1</sup> range and they are predicted theoretically as almost pure modes (100% PED) with very weak and almost null IR intensity and weak Raman activity, in accordance to that observed experimentally. Mode **2** appears characterized as  $\nu(\text{C}_3\text{-H})$  and scaled at similar wavenumbers in both molecules: at 3112 cm<sup>-1</sup> in **1a** and 3106 cm<sup>-1</sup> in **2a**. Mode **20b** is characterized as  $\nu(\text{C}_5\text{-H})$  and scaled also at similar wavenumbers in accordance to the very weak effect of the COOH group on the benzene ring modes. Slight differences are only observed in modes **7b** and **20a**, where mode **7b**, in general characterized as  $\nu(\text{C}_2\text{-H})$ , is scaled at 3084 cm<sup>-1</sup> in **1a**, and at 3066 cm<sup>-1</sup> in **2a**, while mode **20a** is scaled at 3093 cm<sup>-1</sup> in **1a** and at 3079 cm<sup>-1</sup> in **2a**,

The aromatic C-C stretching vibrations, modes **8a** and **8b**, appears characterized as almost pure modes, with %PED higher than 90%, and they are observed in the spectra at similar wavenumbers. Mode **8a**, is predicted in both molecules with the highest Raman intensity. Thus, it is scaled in **1a** at 1625 cm<sup>-1</sup> and good related to the very strong Raman line observed at 1615.2 cm<sup>-1</sup>, while in **2a** is predicted at 1629 cm<sup>-1</sup> and well related to the experimental Raman line at 1610.4 cm<sup>-1</sup>. Mode **8b** is predicted with very weak IR intensity and weak-medium Raman activity in accordance to that observed in the spectra.

In modes **19a** and **19b** the motions appear characterized as CC+CH in accordance to benzene molecule [15] and their derivatives [11], and little coupled with other vibrations. Mode **19a** is predicted in **1a** with strong IR and Raman intensity at 1520 cm<sup>-1</sup>, in accordance to the very strong IR band at 1514.0 cm<sup>-1</sup> and to the strong Raman line at 1511.1 cm<sup>-1</sup>. In **2a** it is predicted with the strongest IR intensity in accordance to the very strong IR band observed experimentally at 1514.0 cm<sup>-1</sup>, and it is also predicted with strong Raman intensity in good accordance to the very strong Raman line observed in the spectrum at 1515.9 cm<sup>-1</sup>. Mode **19b** was predicted, by contrast, with weak intensity at 1438 cm<sup>-1</sup> in agreement with the IR band detected experimentally at 1434.0 cm<sup>-1</sup>.

The C-C stretching, mode **14**, appears coupled in **1a** with  $\nu_s(\text{NNN})$  and predicted at 1345 cm<sup>-1</sup> with weak-medium IR and Raman intensity in accordance to that observed in the experimental IR spectrum at 1333.7 cm<sup>-1</sup>. In molecule **2a** it is coupled with  $\delta(\text{CH}_3)$  and appears scaled at 1331 cm<sup>-1</sup> and well related to the IR band observed at 1339.5 cm<sup>-1</sup>. Because this mode **14** appears coupled with normal modes that are characterized at higher wavenumbers, its wavenumber is blue-shifted to a higher value than that reported in benzene molecule [15], calculated at 1341.7 cm<sup>-1</sup> and scaled at 1309 cm<sup>-1</sup> with the PSE procedure used in the present work.

### Raman intensity calculations

Harmonic wavenumber computations were carried out at the same level of the respective optimization process and by the analytic evaluation of the second derivative of the energy with respect to nuclear displacement. The calculated Raman scattering activities ( $S_i$ ) were converted into relative Raman intensities ( $I_i$ ) using the following relationship derived from the basic theory of Raman scattering.

$$I_i = \frac{f (v_o - v_i)^4 S_i}{v_i \left[ 1 - e^{-\left(\frac{hcv_i}{kT}\right)} \right]}$$

Where the symbols are defined as:  $v_o$ : the frequency (cm<sup>-1</sup>) of exciting radiation,  $v_i$ : the vibrational frequency of the  $i^{\text{th}}$  normal mode,  $h$ : Planck constant,  $c$ : speed of light,  $k$ : Boltzmann constant and  $T$ : absolute temperature,  $f$ : a suitably chosen scaling factor common to all the peak intensities.

### Interaction energy calculations

The interaction energies were calculated in the dimer form of the molecules under study. These calculations were carried out only at the M06-2X/6-31G(d,p) level, and the values obtained were corrected for basis set superposition error, according to the procedure [40] which is as follow for the present study:

The total counterpoise (CP) corrected interaction energy of the dimer  $AA'$  is defined as  $\Delta E_{AA'}^{CP}$ , where  $AA'$  corresponds to both molecules of dimer, and it can be determined according to the following relation:

$$\Delta E_{AA'}^{CP} = E^{\text{int}}(AA') + E^{\text{def}}(AA') \quad \{1\}$$

$$\text{where, } E^{\text{int}}(AA') = E_{AA'}^{AA'}(AA') - E_A^{AA'}(AA') - E_{A'}^{AA'}(AA') \quad \{2\}$$

In this equation,  $E_{AA'}^{AA'}(AA')$  corresponds to the calculated electronic energy at the optimized geometry of the dimer ( $AA'$ ), and  $E_A^{AA'}(AA')$  and  $E_{A'}^{AA'}(AA')$  represents the electronic energy of each molecule,  $A$  and  $A'$  of the dimer ( $AA'$ ).

$$\text{The deformation energy } E^{\text{def}}(AA') \text{ is described as: } E^{\text{def}}(AA') = E_A^{\text{def}}(AA') + E_{A'}^{\text{def}}(AA') \quad \{3\}$$

Where  $E_A^{def}(AA')$  and  $E_{A'}^{def}(AA')$  of each monomer in the dimer can be determined by the following equations:

$$E_A^{def}(AA') = E_A^A(AA') - E_A^A(A)$$

and  $E_{A'}^{def}(AA') = E_{A'}^{A'}(AA') - E_{A'}^{A'}(A') = E_{A'}^{A'}(AA') - E_A^A(A)$  {4}

In these equations the parentheses indicate whether the computations in the dimer form were done at the optimized molecular geometry of each monomer form (A and A') or that of the dimer (AA'). Because the optimized form of each monomer is the same,  $E_A^A(A) = E_{A'}^{A'}(A')$ .

The superscripts denote whether the calculations were done with the basis set of monomer or dimer, and the subscripts indicate the molecular system studied.

[40] Boys, S.F.; Bernardi, F. Calculation of small molecular interactions by differences of separate total energies. Some procedures with reduced errors. *Molec. Phys.*, **1970**, 19(4), 553.

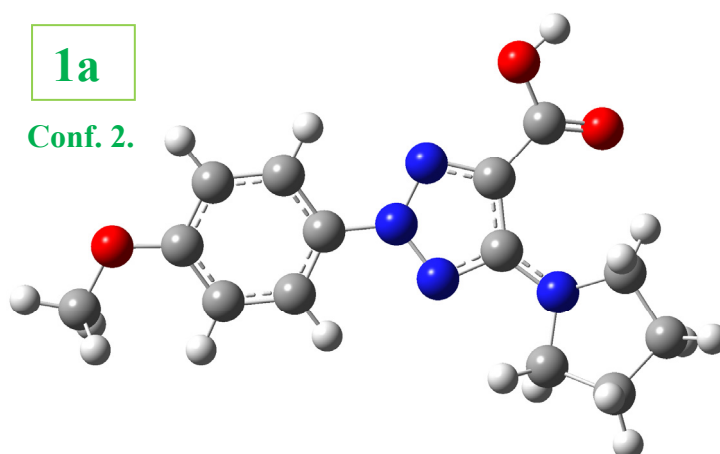

$$E(\text{MP2+ZPE}) = -984.622986 \text{ AU } (G = -984.672646 \text{ AU})$$

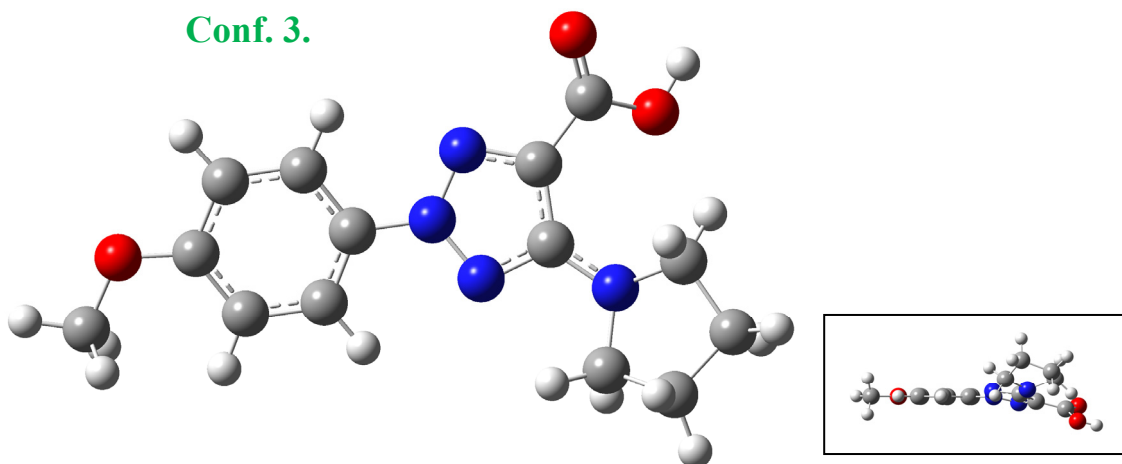

$$E(\text{MP2+ZPE}) = -984.619026 \text{ AU } (G = -984.669435 \text{ AU})$$

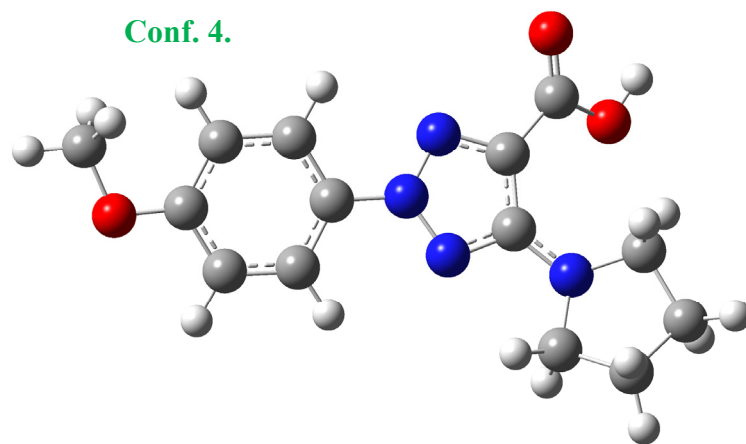

$$E(\text{MP2+ZPE}) = -984.619127 \text{ AU} \text{ (G} = -984.669555 \text{ AU)}$$

**Figure S1-SUP.** Others optimized conformers of **1a** molecule at the MP2/6-31G(d,p) level.

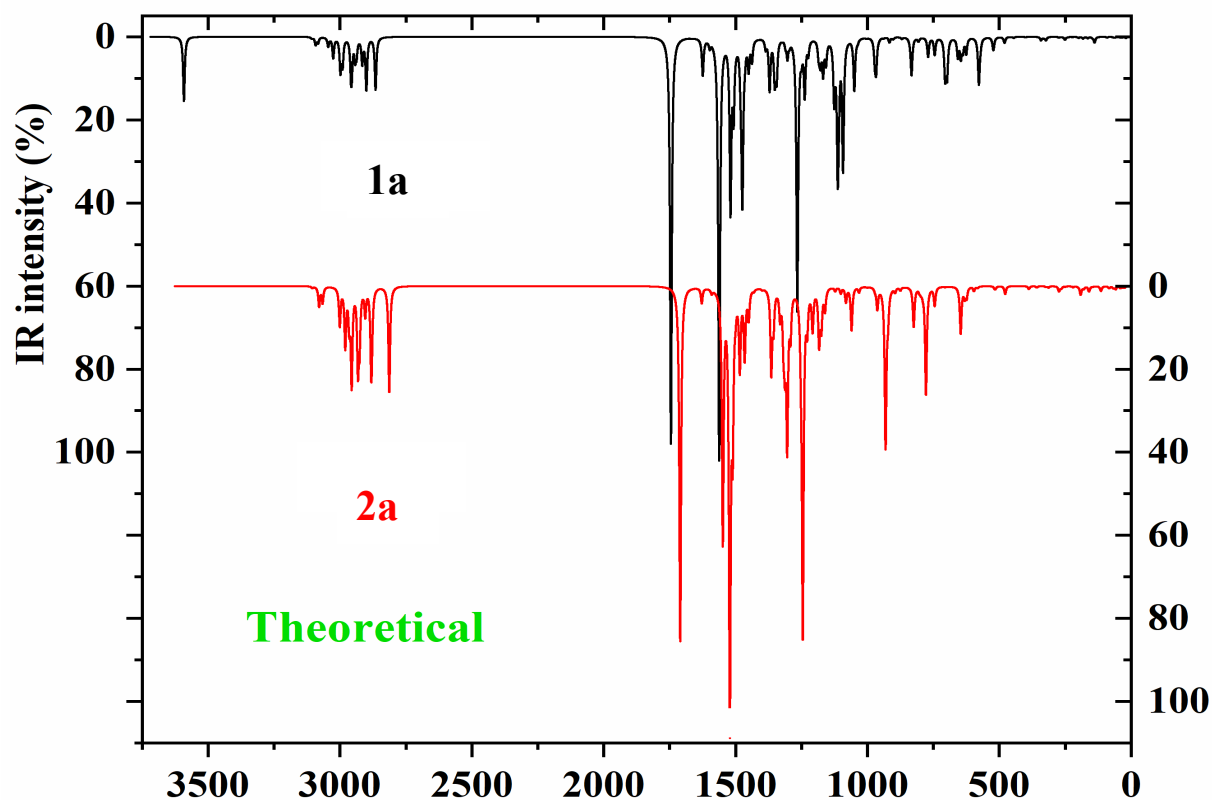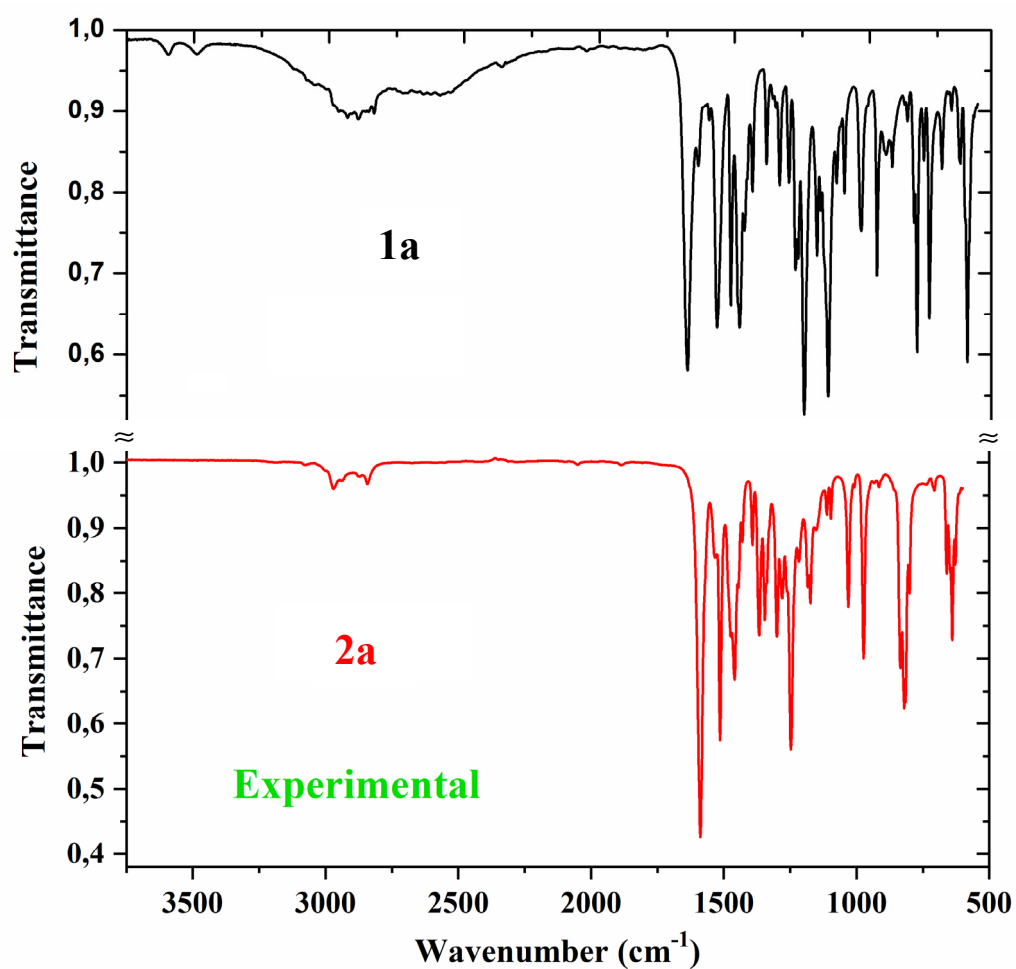

**Figure S2-SUP.** Comparison of the theoretical scaled IR spectra in the 3750-0 cm<sup>-1</sup> range with the experimental ones in the 3750-500 cm<sup>-1</sup> range of **1a** and **2a** molecules.

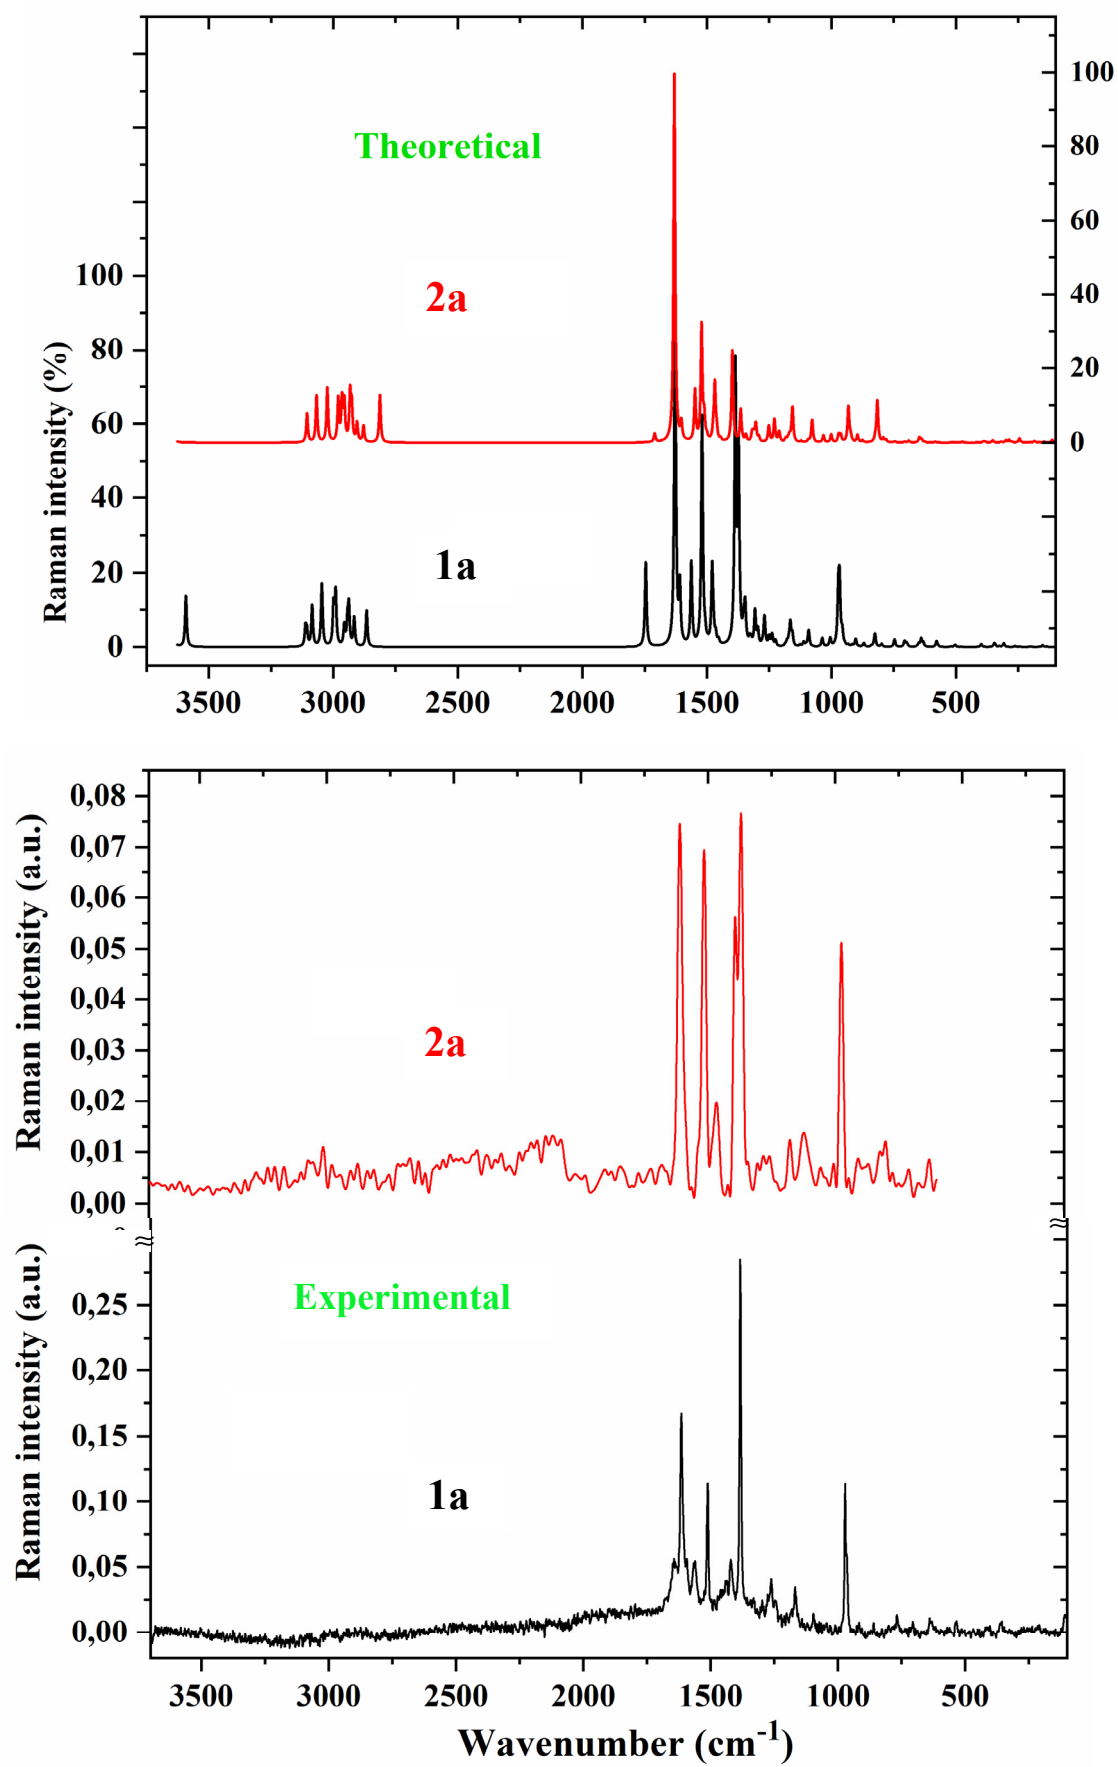

**Figure S3-SUP.** Comparison of the theoretical scaled IR spectra with the experimental ones in the 3750-100  $\text{cm}^{-1}$  range of **1a** and **2a** molecules.

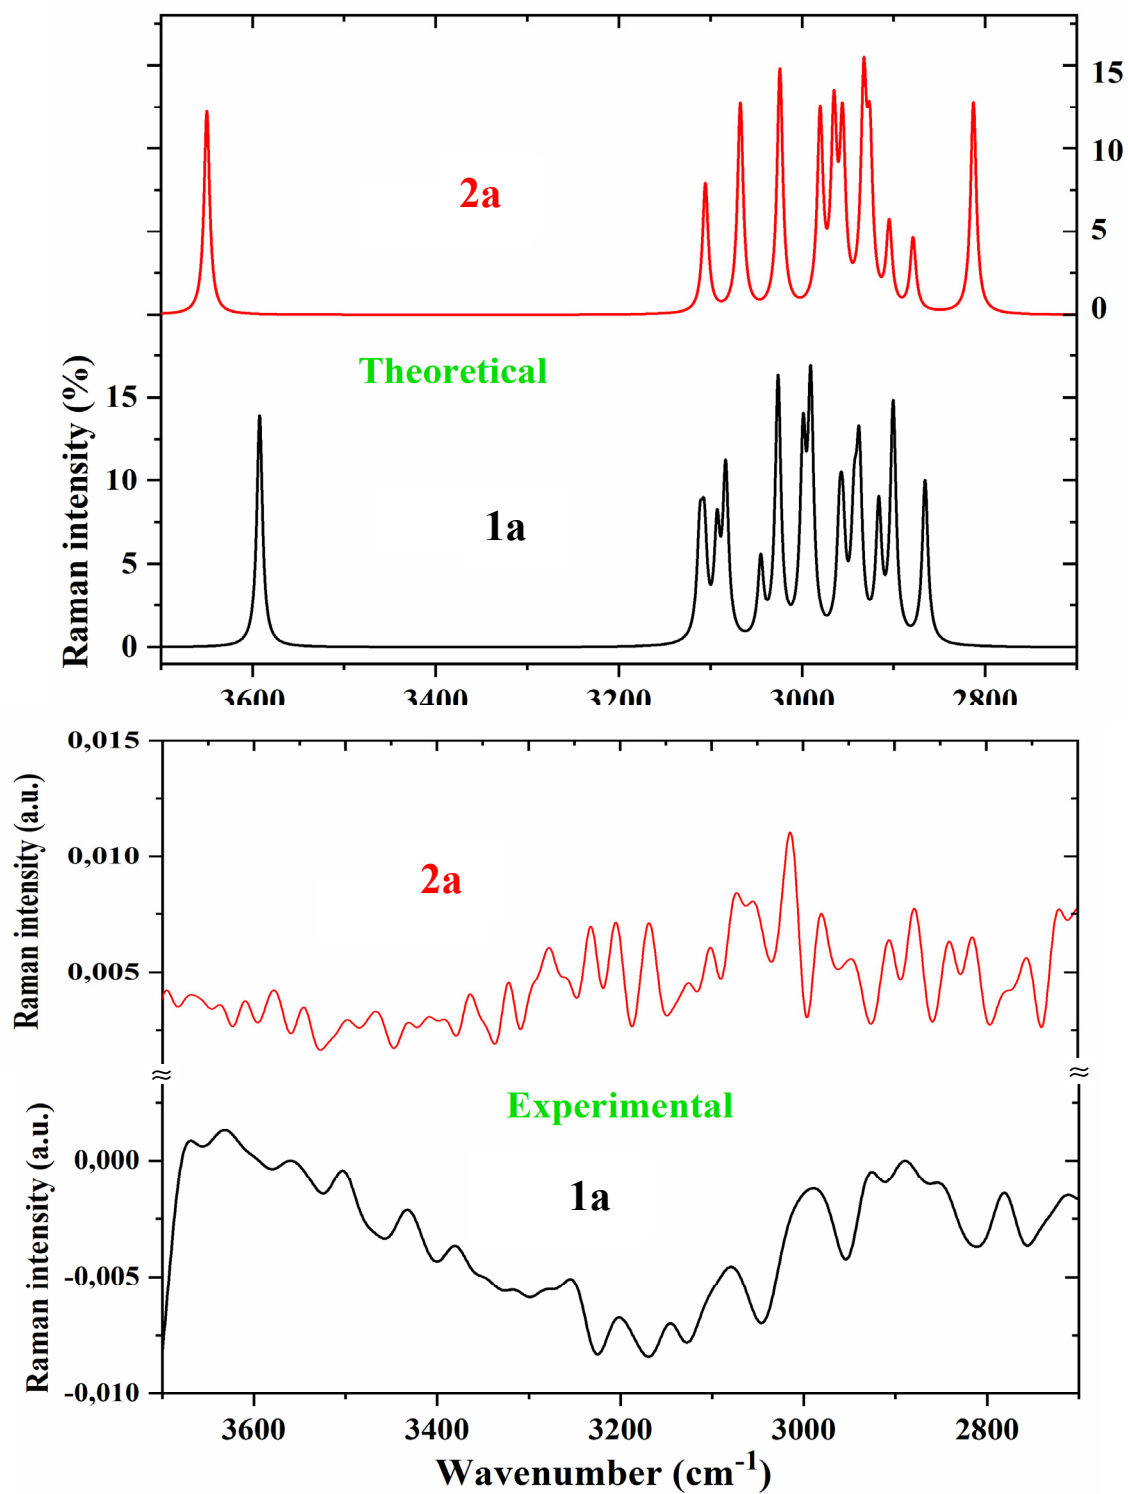

**Figure S4-SUP.** Comparison of the theoretical scaled Raman spectra with the experimental ones of **1a** and **2a** molecules in the 3700-2700  $\text{cm}^{-1}$  range.

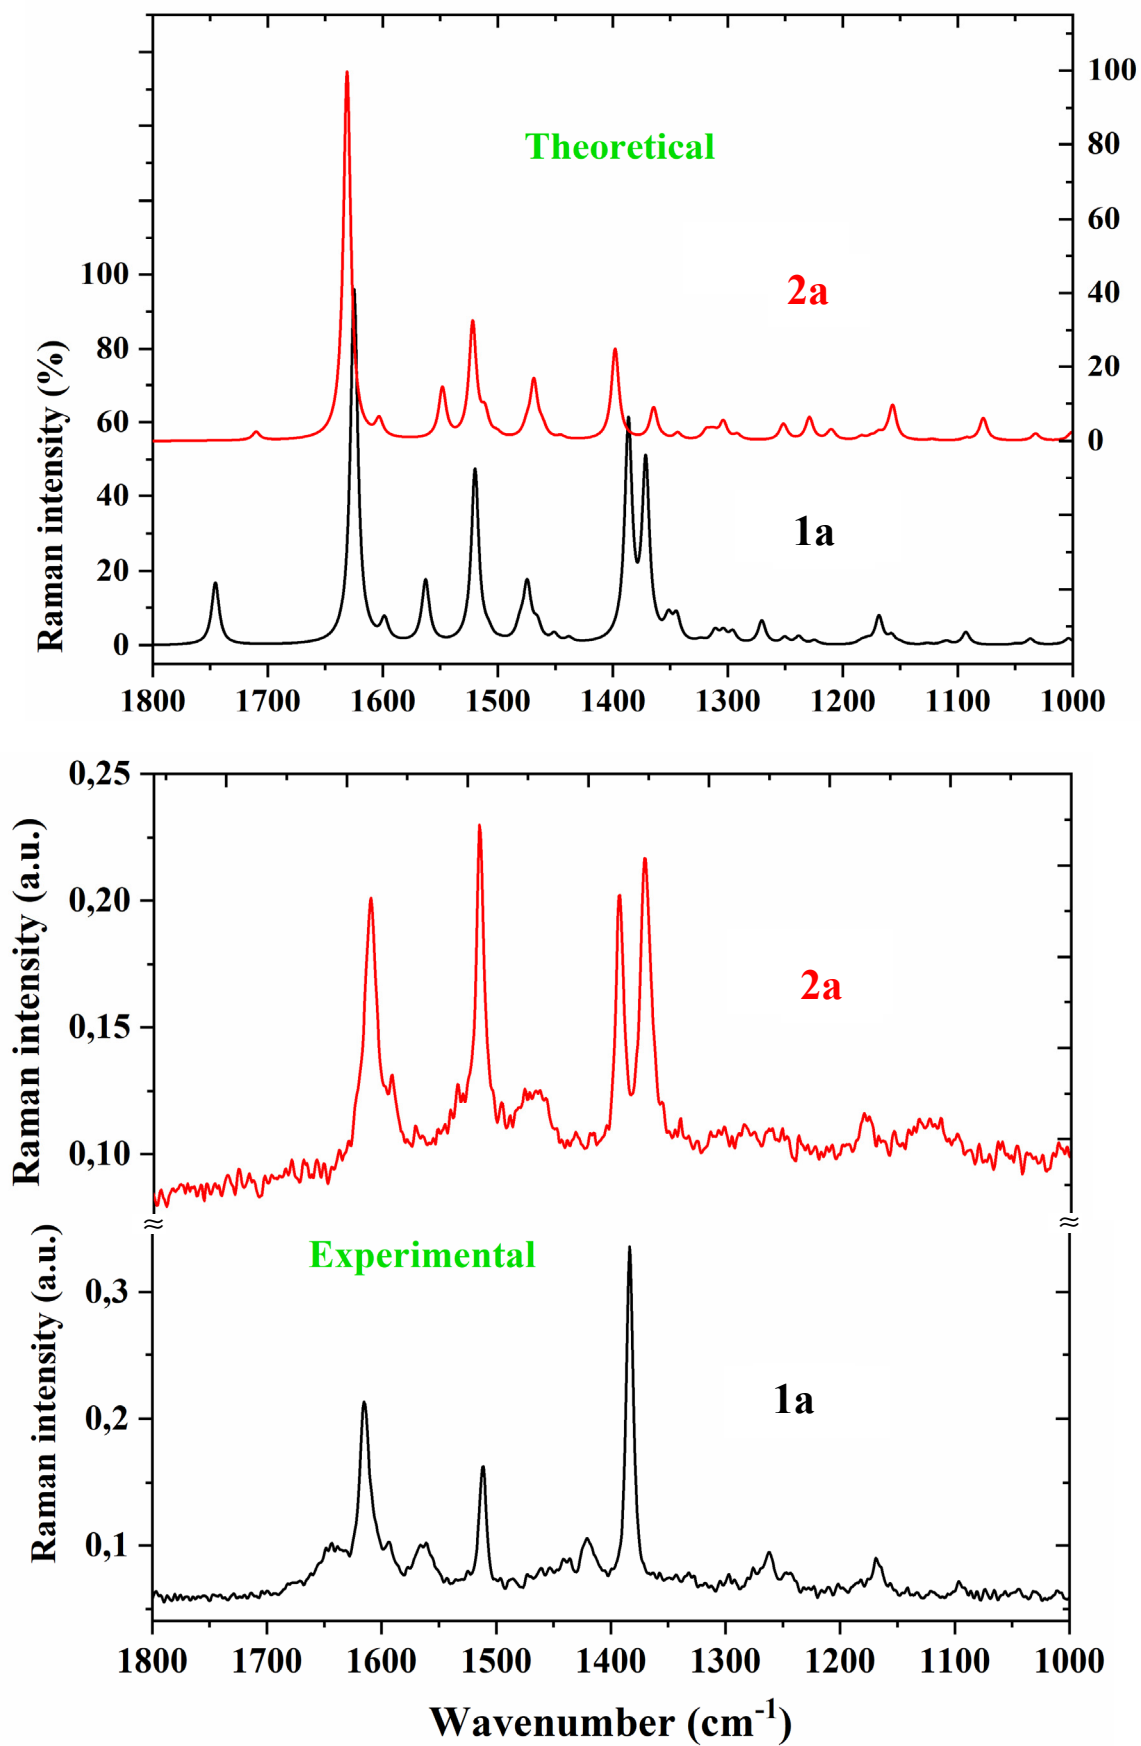

**Figure S5-SUP.** Comparison of the theoretical scaled Raman spectra with the experimental ones of **1a** and **2a** molecules in the 1800-1000  $\text{cm}^{-1}$  range.

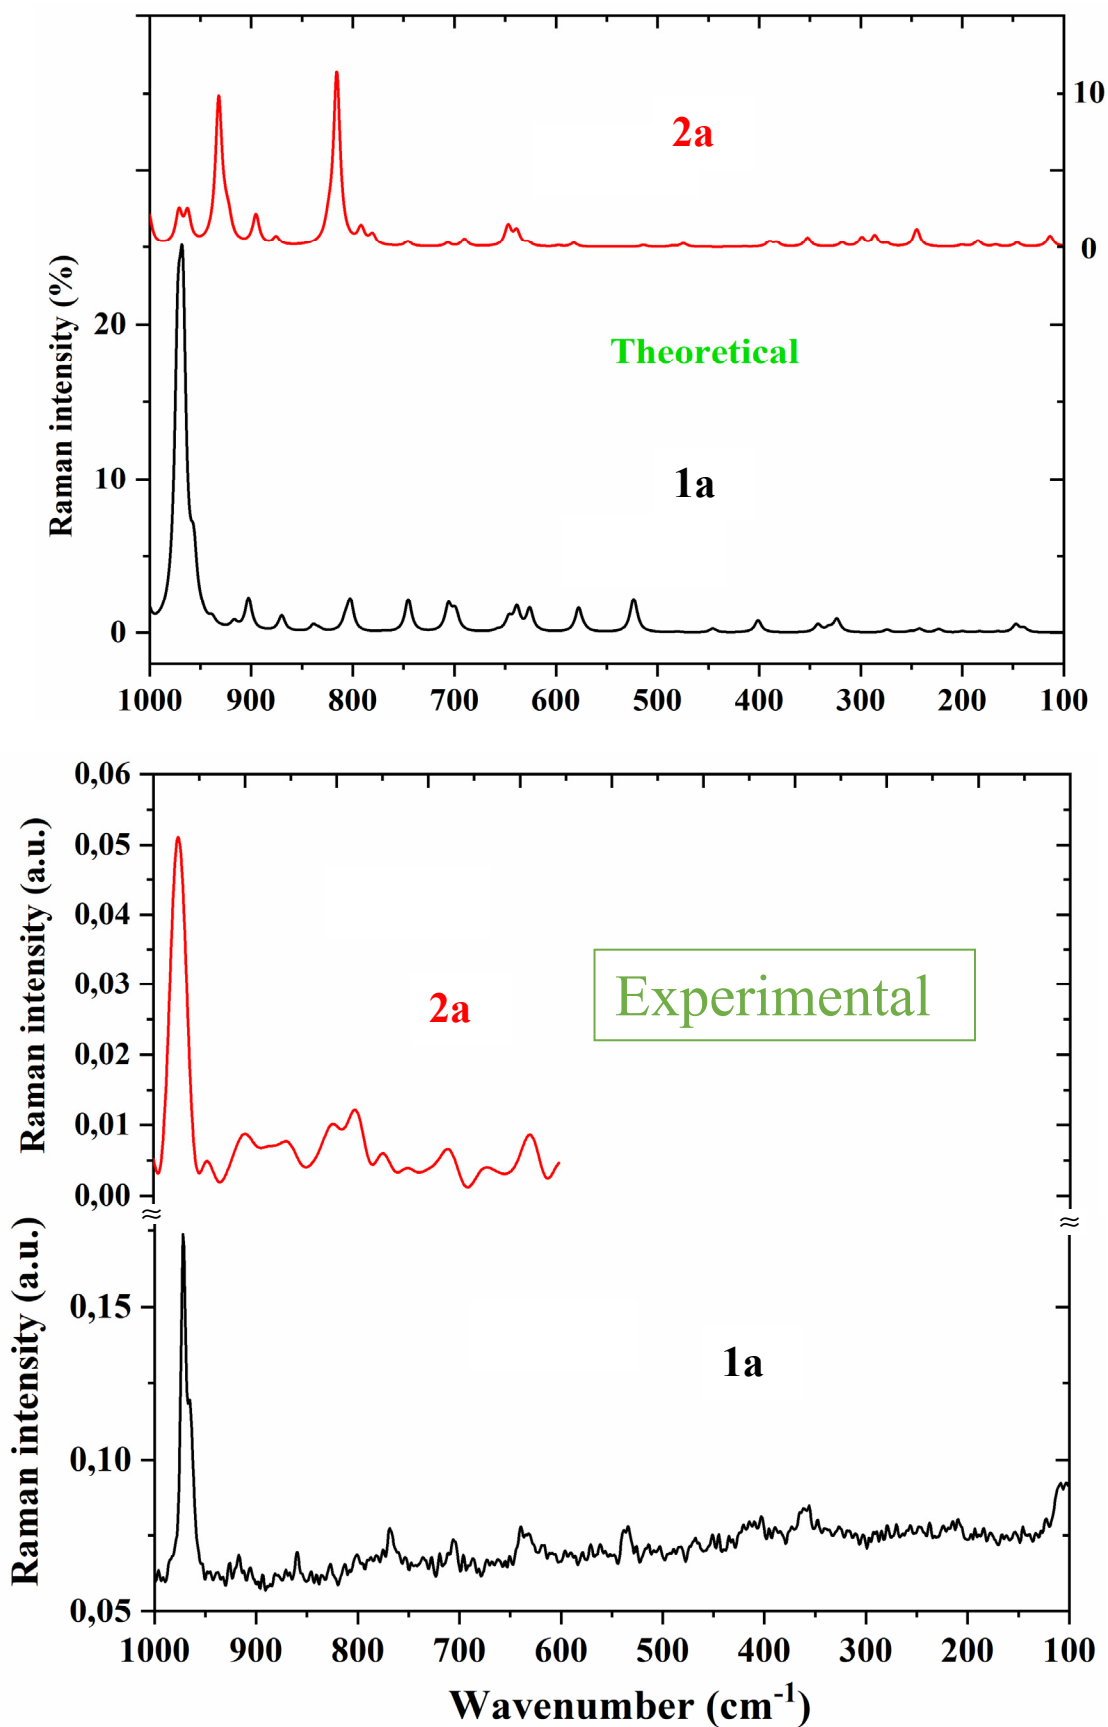

**Figure S6-SUP.** Comparison of the theoretical scaled Raman spectra with the experimental ones of **1a** and **2a** molecules in the 1000 – 0 and 1000-100  $\text{cm}^{-1}$  ranges, respectively.

**Table S1-SUP.** Several selected optimized geometrical parameters calculated in the monomer form with the 6-31G(d,p) basis set. Bond lengths (r) in Å, bond angles and dihedral angles ( $\angle$ ) in degrees.

| Parameters                                                                     | -OCH <sub>3</sub> |        |        |        | CL     | -OH    | -ONH <sub>2</sub> | -OCF <sub>3</sub> |
|--------------------------------------------------------------------------------|-------------------|--------|--------|--------|--------|--------|-------------------|-------------------|
|                                                                                | B3LYP             |        | MP2    |        | MP2    | MP2    | MP2               | MP2               |
|                                                                                | 1a                | 2a     | 1a     | 2a     | 1b     | 1c     | 1d                | 1e                |
| r(C <sub>4</sub> -N <sub>4</sub> )                                             | 1.421             | 1.398  | 1.418  | 1.401  | 1.417  | 1.418  | 1.419             | 1.417             |
| r(N <sub>4</sub> -N <sub>7</sub> )                                             | 1.349             | 1.357  | 1.340  | 1.348  | 1.340  | 1.340  | 1.340             | 1.340             |
| r(N <sub>4</sub> -N <sub>10</sub> )                                            | 1.311             | 1.343  | 1.334  | 1.350  | 1.334  | 1.334  | 1.334             | 1.334             |
| r(C <sub>8</sub> -C <sub>9</sub> )                                             | 1.440             | 1.448  | 1.422  | 1.427  | 1.423  | 1.422  | 1.422             | 1.424             |
| r(C <sub>9</sub> -N <sub>10</sub> )                                            | 1.347             | 1.329  | 1.358  | 1.350  | 1.357  | 1.358  | 1.358             | 1.356             |
| r(C <sub>9</sub> -C <sub>11</sub> )                                            | 1.465             | 1.549  | 1.466  | 1.541  | 1.467  | 1.466  | 1.466             | 1.468             |
| r(CL/O <sub>1</sub> ...O <sub>12</sub> )                                       | 9.934             | 9.857  | 9.895  | 9.872  | 10.227 | 9.889  | 9.898             | 9.875             |
| O <sub>12</sub> ...H <sub>18</sub>                                             | 2.152             | 1.980  | 2.181  | 2.030  | 2.186  | 2.181  | 2.180             | 2.188             |
| $\angle$ (C <sub>4</sub> -N <sub>4</sub> -N <sub>7</sub> )                     | 121.6             | 122.4  | 121.5  | 121.9  | 121.5  | 121.5  | 121.5             | 121.5             |
| $\angle$ (C <sub>4</sub> -N <sub>4</sub> -N <sub>10</sub> )                    | 122.5             | 122.7  | 121.7  | 122.0  | 121.7  | 121.7  | 121.8             | 121.7             |
| $\angle$ (N-N-N)                                                               | 115.9             | 115.0  | 116.7  | 116.1  | 116.8  | 116.7  | 116.7             | 116.8             |
| $\angle$ (N <sub>10</sub> -C <sub>9</sub> -C <sub>11</sub> )                   | 119.7             | 121.0  | 119.2  | 120.7  | 119.2  | 119.2  | 119.3             | 119.2             |
| $\angle$ (N <sub>7</sub> -C <sub>8</sub> -N <sub>14</sub> )                    | 119.4             | 119.5  | 119.6  | 119.1  | 119.6  | 119.6  | 119.6             | 119.6             |
| $\angle$ (C <sub>9</sub> -C <sub>8</sub> -N <sub>14</sub> )                    | 133.2             | 131.0  | 132.6  | 131.0  | 132.7  | 132.6  | 132.6             | 132.7             |
| $\angle$ (C <sub>9</sub> -C <sub>11</sub> =O <sub>12</sub> )                   | 126.1             | 113.9  | 125.7  | 113.6  | 125.6  | 125.7  | 125.7             | 125.6             |
| $\angle$ (C <sub>9</sub> -C <sub>11</sub> -O <sub>13</sub> )                   | 112.4             | 115.7  | 111.9  | 115.3  | 111.8  | 111.9  | 111.9             | 111.8             |
| $\angle$ (O=C=O)                                                               | 121.4             | 130.3  | 122.4  | 131.0  | 122.6  | 122.4  | 122.4             | 122.6             |
| $\angle$ (C <sub>5</sub> -C <sub>4</sub> -N <sub>4</sub> -N <sub>10</sub> )    | -1.6              | -1.1   | -14.2  | -3.0   | -10.3  | -13.7  | -14.9             | -10.7             |
| $\angle$ (C <sub>4</sub> -N <sub>4</sub> -N <sub>10</sub> -C <sub>9</sub> )    | -179.0            | -178.5 | -179.2 | -178.8 | -178.9 | -179.1 | -179.2            | -179.0            |
| $\angle$ (N <sub>4</sub> -N <sub>10</sub> -C <sub>9</sub> -C <sub>11</sub> )   | 175.6             | 175.3  | 173.6  | 176.1  | 173.7  | 173.6  | 173.6             | 173.7             |
| $\angle$ (N <sub>10</sub> -N <sub>4</sub> -N <sub>7</sub> -C <sub>8</sub> )    | -0.4              | -1.1   | -0.9   | -1.4   | -0.8   | -0.9   | -0.9              | -0.8              |
| $\angle$ (N <sub>10</sub> -C <sub>9</sub> -C=O <sub>12</sub> )                 | -165.9            | -145.7 | -157.1 | -149.3 | -156.3 | -157.1 | -157.3            | -156.1            |
| $\angle$ (N <sub>10</sub> -C <sub>9</sub> -C-O <sub>13</sub> )                 | 13.0              | 32.8   | 21.9   | 29.8   | 22.6   | 21.9   | 21.7              | 22.9              |
| $\angle$ (C <sub>8</sub> -C <sub>9</sub> -C=O <sub>12</sub> )                  | 9.6               | 29.1   | 15.0   | 26.5   | 16.0   | 15.0   | 14.7              | 16.4              |
| $\angle$ (C <sub>11</sub> -C <sub>9</sub> -C <sub>8</sub> -N <sub>14</sub> )   | 4.8               | 4.4    | 8.0    | 2.5    | 8.0    | 8.0    | 8.1               | 8.0               |
| $\angle$ (C <sub>9</sub> -C <sub>8</sub> -N <sub>14</sub> -C <sub>15</sub> )   | 178.2             | 177.8  | 173.2  | 172.5  | 172.9  | 173.2  | 173.3             | 172.7             |
| $\angle$ (C <sub>9</sub> -C <sub>8</sub> -N <sub>14</sub> -C <sub>18</sub> )   | 19.7              | 22.2   | 26.4   | 35.6   | 24.9   | 26.4   | 27.0              | 24.4              |
| $\angle$ (C <sub>8</sub> -N <sub>14</sub> -C <sub>15</sub> -C <sub>16</sub> )  | -163.0            | -169.6 | -151.8 | -163.7 | -152.0 | -151.8 | -151.7            | -152.0            |
| $\angle$ (N <sub>14</sub> -C <sub>15</sub> -C <sub>16</sub> -C <sub>17</sub> ) | -21.5             | -14.0  | -22.9  | -5.1   | -23.6  | -22.9  | -22.6             | -23.8             |

**Table S2-SUP.** Calculated harmonic wavenumbers ( $\nu$ ,  $\text{cm}^{-1}$ ), scaled ( $\nu$ ,  $\text{cm}^{-1}$ ) wavenumbers obtained and the linear scaling equation procedure (LSE) and the polynomial scaling equation procedure (PSE), experimental (Exp) wavenumbers, relative infrared intensity (A) in % and relative Raman intensity (S) in % obtained at the B3LYP/6-31G(d,p) level in **1a** and **2a** molecules. In the main characterization of the different bands, the number of the ring mode corresponds to Wilson's notation [17].

| No | 1a                 |                     |                     |     |     |                |           |                                                                                                    | 2a                 |                     |                     |     |     |           |           |                                                                                                              |
|----|--------------------|---------------------|---------------------|-----|-----|----------------|-----------|----------------------------------------------------------------------------------------------------|--------------------|---------------------|---------------------|-----|-----|-----------|-----------|--------------------------------------------------------------------------------------------------------------|
|    | $\nu^{\text{cal}}$ | TLSE                | PSE                 | A   | S   | Exp            |           | Characterization                                                                                   | $\nu^{\text{cal}}$ | TLSE                | PSE                 | A   | S   | EXP       |           | Characterization                                                                                             |
|    |                    | $\nu^{\text{scal}}$ | $\nu^{\text{scal}}$ |     |     | IR             | Raman     |                                                                                                    |                    | $\nu^{\text{scal}}$ | $\nu^{\text{scal}}$ |     |     | IR        | Raman     |                                                                                                              |
| 1  | 3762               | 3607                | 3592                | 15  | 17  | 3596.1 w       |           | $\nu(\text{O}13\text{-H})$ in COOH (100)                                                           |                    | --                  | --                  | --  | --  |           |           |                                                                                                              |
|    |                    |                     |                     |     |     | 3491.0 w       | 3504.2 vw | $\nu(\text{O}13\text{-H})$ H-bonded in COOH                                                        |                    | --                  | --                  | --  | --  |           |           |                                                                                                              |
| 2  | 3243               | 3113                | 3112                | 0   | 6   | 3127.4 vw      | 3110.8 vw | 2, $\nu(\text{C}_3\text{-H})$ in aryl (100)                                                        | 3237               | 3108                | 3106                | 0   | 7   |           |           | 2, $\nu(\text{C}_3\text{-H})$ in aryl (100)                                                                  |
| 3  | 3238               | 3109                | 3107                | 0   | 6   | 3102.3 vw      | 3107.0 vw | 20b, $\nu(\text{C}_5\text{-H})$ in aryl (100)                                                      | 3236               | 3107                | 3105                | 0   | 3   |           | 3125.3 vw | 20b, $\nu(\text{C}_5\text{-H})$ in aryl (100)                                                                |
| 4  | 3223               | 3094                | 3093                | 2   | 6   |                |           | 20a, $\nu(\text{C}_6\text{-H})$ in aryl (100)                                                      | 3208               | 3080                | 3079                | 5   | 9   | 3078.2 vw |           | 20a, $\nu(\text{C}_6\text{-H})$ in aryl                                                                      |
| 5  | 3213               | 3085                | 3084                | 1   | 10  | 3083.0 vw      | 3076.1 vw | 7b, $\nu(\text{C}_2\text{-H})$ in aryl (100)                                                       | 3194               | 3067                | 3066                | 4   | 12  |           | 3075.1 vw | 7b, $\nu(\text{C}_2\text{-H})$ (100)                                                                         |
| 6  | 3172               | 3046                | 3045                | 2   | 5   | 3053.1 vw      | 3067.4 vw | $\nu_{\text{as}}(\text{C-H})$ in $\text{C}_{18}\text{H}_2$ pyrrolidine (100)                       | 3124               | 3000                | 3001                | 9   | 17  |           | 3014.4 vw | $\nu_{\text{as}}(\text{C-H})$ in $\text{CH}_3$ (100)                                                         |
| 7  | 3151               | 3026                | 3026                | 5   | 16  | 3044.5 vw      | 3025.9 vw | $\nu_{\text{as}}(\text{C-H})$ in $\text{CH}_3$ (100)                                               | 3102               | 2979                | 2980                | 13  | 12  |           | 2982.6 vw | $\nu_{\text{as}}(\text{C-H})$ in phase in $\text{C}_{16}\text{H}_2, \text{C}_{17}\text{H}_2$ (100)           |
| 8  | 3122               | 2998                | 2999                | 8   | 11  | 3009.7 vw      | 3018.0 vw | $\nu_{\text{as}}(\text{C-H})$ in $\text{C}_{16}\text{H}_2, \text{C}_{17}\text{H}_2$ pyrroli (100)  | 3086               | 2964                | 2965                | 8   | 12  |           | 2975.8 vw | $\nu_{\text{as}}(\text{C-H})$ in $\text{C}_{16}\text{H}_2, \text{C}_{17}\text{H}_2$ pyrrolidin(100)          |
| 9  | 3113               | 2990                | 2990                | 6   | 15  | 2985.6 w       | 2995.1 vw | $\nu_{\text{as}}(\text{C-H})$ in $\text{C}_{16}\text{H}_2, \text{C}_{17}\text{H}_2$ pyrroli(100)   | 3076               | 2955                | 2956                | 22  | 11  | 2969.2 w  | 2951.7 vw | $\nu_{\text{as}}(\text{C-H})$ in $\text{C}_{18}\text{H}_2$ pyrrolidine (100)                                 |
| 10 | 3079               | 2958                | 2959                | 7   | 6   | 2964.4 w       | 2968.1 vw | $\nu_{\text{as}}(\text{C-H})$ in $\text{CH}_3$ (100)                                               | 3051               | 2931                | 2933                | 8   | 13  | 2938.4 sh | 2941.1 vw | $\nu_{\text{s}}(\text{C-H})$ in $\text{C}_{17}\text{H}_2$ pyrrolidine (100)                                  |
| 11 | 3076               | 2955                | 2956                | 6   | 5   | 2953.8 vw      |           | $\nu(\text{C-H})$ in $\text{C}_{15}\text{H}_2, \text{C}_{16}\text{H}_2$ pyrrolidi (100)            | 3050               | 2930                | 2932                | 10  | 6   |           |           | $\nu_{\text{as}}(\text{C-H})$ in $\text{CH}_3$ (100)                                                         |
| 12 | 3062               | 2941                | 2943                | 4   | 6   |                | 2941.1 vw | $\nu(\text{C-H})$ in pyrrolidine (100)                                                             | 3044               | 2924                | 2926                | 12  | 9   |           | 2911.2 vw | $\nu_{\text{s}}(\text{C-H})$ in $\text{C}_{16}\text{H}_2$ pyrrolidine (100)                                  |
| 13 | 3056               | 2936                | 2937                | 4   | 10  | 2931.6 w       | 2928.6 vw | $\nu(\text{C-H})$ in pyrrolidine (100)                                                             | 3021               | 2902                | 2905                | 6   | 5   |           |           | $\nu_{\text{as}}(\text{C-H})$ in $\text{C}_{15}\text{H}_2$ pyrrolidine (100)                                 |
| 14 | 3033               | 2914                | 2916                | 6   | 8   | 2917.2 w       | 2922.8 vw | $\nu_{\text{s}}(\text{C-H})$ in $\text{C}_{15}\text{H}_2$ pyrrolidine (100)                        | 2997               | 2880                | 2882                | 17  | 20  | 2870.9 vw | 2898.7 vw | $\nu_{\text{s}}(\text{C-H})$ in $\text{CH}_3$ (100)                                                          |
| 15 | 3017               | 2899                | 2901                | 12  | 14  | 2892.1 w       | 2897.7 vw | $\nu_{\text{s}}(\text{C-H})$ in $\text{CH}_3$ (100)                                                | 2994               | 2877                | 2879                | 7   | 4   | 2841.9 w  | 2880.3 vw | $\nu_{\text{s}}(\text{C-H})$ in $\text{C}_{15}\text{H}_2$ pyrrolidine (100)                                  |
| 16 | 2979               | 2862                | 2865                | 12  | 10  | 2866.1 w       |           | $\nu_{\text{s}}(\text{C-H})$ in $\text{C}_{18}\text{H}_2$ pyrrolidine (100)                        | 2924               | 2810                | 2814                | 24  | 13  | 2673.9 vw | 2808.0 vw | $\nu_{\text{s}}(\text{C-H})$ in $\text{C}_{18}\text{H}_2$ pyrrolidine (100)                                  |
|    | --                 | --                  | --                  | --  | --  | 2834.2 w       |           | $\nu(\text{O-H})_{\text{H-bonded}}$ , Combination band                                             | --                 | --                  | --                  | --  | --  | 2359.7vw  | 2638.3 vw | Combination bands                                                                                            |
|    | --                 | --                  | --                  | --  | --  | 2726.2, 2623.0 | 2723.2 vw | $\nu(\text{O-H})_{\text{H-bonded}}$ , Combination band                                             | --                 | --                  | --                  | --  | --  | 2284.6vw  |           | Combination bands                                                                                            |
| 17 | 1796               | 1738                | 1745                | 97  | 18  | 1675.1 vs      | 1643.2 m  | $\nu(\text{C=O})$ (92)                                                                             | 1759               | 1702                | 1710                | 83  | 2   | 1588.3 vs | 1629.7 vw | $\nu_{\text{as}}(\text{COO})$ (96)                                                                           |
| 18 | 1670               | 1618                | 1625                | 9   | 100 | 1634.6 w       | 1615.2 vs | 8a, $\nu(\text{C=C})$ (96)                                                                         | 1674               | 1622                | 1629                | 3   | 100 |           | 1610.4 vs | 8a, $\nu(\text{C=C})$ (95)                                                                                   |
| 19 | 1643               | 1592                | 1599                | 2   | 6   | 1594.0 vw      | 1594.0 m  | 8b, $\nu(\text{C=C})$ (97)                                                                         | 1634               | 1583                | 1590                | 1   | 2   |           | 1592.1 m  | 8b, $\nu(\text{C=C})$ (89)                                                                                   |
| 20 | 1605               | 1556                | 1562                | 100 | 17  | 1565.1 vs      | 1561.2 m  | $\nu(\text{C}_8\text{-N}_{14})$ (65) + $\nu_{\text{s}}(\text{N}_7\text{CC})$ (20)                  | 1591               | 1543                | 1549                | 58  | 12  | 1533.3 w  | 1535.2 w  | $\nu(\text{C}_8\text{-N}_{14})$ (72) + $\nu_{\text{s}}(\text{N}_7\text{CC})$ (15)                            |
| 21 | 1561               | 1514                | 1520                | 40  | 48  | 1514.0 vs      | 1511.1 s  | 19a, $\nu(\text{CC})(87)+\delta_{\text{s}}(\text{CH})$ pyrrolidi (11)                              | 1563               | 1516                | 1522                | 100 | 23  | 1514.0 vs | 1515.9 vs | 19a, $\nu(\text{CC})$ (76)+ $\delta_{\text{s}}(\text{CH})$ pyrrolidine(18)                                   |
| 22 | 1548               | 1502                | 1507                | 17  | 2   |                | 1524.6 w  | $\delta_{\text{s}}(\text{C-H})$ $\text{C}_{15}\text{H}_2, \text{C}_{18}\text{H}_2$ in-phase(98)    | 1552               | 1505                | 1511                | 32  | 5   |           | 1504.3 sh | $\delta_{\text{s}}(\text{C-H})$ in $\text{C}_{15}\text{H}_2, \text{C}_{18}\text{H}_2$ in phase (84)          |
| 23 | 1537               | 1491                | 1497                | 0   | 0   |                |           | $\delta_{\text{s}}(\text{C-H})\text{C}_{15}\text{H}_2, \text{C}_{18}\text{H}_2$ out-of-phase (100) | 1541               | 1495                | 1501                | 2   | 1   |           | 1496.6 w  | $\delta_{\text{s}}(\text{C-H})$ in $\text{C}_{15}\text{H}_2, \text{C}_{18}\text{H}_2$ out-of phase(97)       |
| 24 | 1520               | 1475                | 1481                | 7   | 3   | 1488.2 sh      | 1496.6 vw | $\delta_{\text{s}}(\text{C-H})$ in $\text{CH}_3$ (100)                                             | 1524               | 1479                | 1484                | 18  | 1   |           |           | $\delta_{\text{s}}(\text{C-H})$ in $\text{CH}_3$ (97)                                                        |
| 25 | 1515               | 1470                | 1476                | 22  | 6   | 1482.2 vs      | 1485.1 w  | $\delta_{\text{s}}(\text{C-H})$ out-of-phase pyrrolidine (83)                                      | 1514               | 1469                | 1475                | 1   | 2   | 1474.5 m  | 1476.4 m  | $\delta_{\text{s}}(\text{C-H})$ out-of-phase in pyrrolidine (92)                                             |
| 26 | 1513               | 1468                | 1474                | 17  | 10  | 1463.9 s       | 1472.5 w  | $\delta_{\text{s}}(\text{C-H})$ out-of-phase pyrrolidine (75)                                      | 1505               | 1461                | 1466                | 15  | 13  | 1460.0 s  | 1466.7 m  | $\nu_{\text{s}}(\text{C}_8\text{C}_9\text{N})(62)+\delta_{\text{s}}(\text{CH}_2)$ (16)+ $\nu(\text{NN})(15)$ |
| 27 | 1505               | 1461                | 1466                | 1   | 3   |                | 1461.0 w  | $\delta_{\text{as}}(\text{C-H})$ in $\text{CH}_3$ (100)                                            | 1500               | 1456                | 1461                | 0   | 2   |           |           | $\delta_{\text{s}}(\text{C-H})$ out-of-phase in pyrrolidine (97)                                             |
| 28 | 1504               | 1460                | 1465                | 1   | 2   | --             | --        | $\delta_{\text{s}}(\text{C-H})$ out-of-phase pyrrolidine (98)                                      | 1500               | 1456                | 1461                | 1   | 3   | --        | 1462.9 m  | $\delta_{\text{as}}(\text{C-H})$ in $\text{CH}_3$ (99)                                                       |
| 29 | 1489               | 1446                | 1451                | 7   | 2   |                |           | $\delta_{\text{s}}(\text{C-H})$ in $\text{CH}_3$ (87)                                              | 1488               | 1445                | 1450                | 7   | 2   | 1444.6 sh | 1448.4 w  | $\delta_{\text{s}}(\text{C-H})$ in $\text{CH}_3$ (87)                                                        |
| 30 | 1476               | 1433                | 1438                | 5   | 1   | 1434.0 m       | 1420.5 m  | 19b, $\nu(\text{CC}, \text{CH})$ in aryl (72)                                                      | 1469               | 1427                | 1431                | 1   | 0   | 1430.1 w  |           | 19b, $\nu(\text{CH}, \text{CC})$ in aryl (65) + $\nu_{\text{s}}(\text{C}_8\text{C}_9\text{N})(14)$           |

|    |      |      |      |    |    |           |           |                                                                                  |      |      |      |    |    |           |           |                                                                                                      |
|----|------|------|------|----|----|-----------|-----------|----------------------------------------------------------------------------------|------|------|------|----|----|-----------|-----------|------------------------------------------------------------------------------------------------------|
| 31 | 1422 | 1382 | 1386 | 2  | 57 |           | 1383.8 s  | $v_s(\text{NNN})(35)+v_s(\text{C4N})(28)+v(\text{COO})(25)$                      | 1435 | 1394 | 1399 | 0  | 20 | 1392.5 w  | 1393.4 vs | $v(\text{C4N})(41)+v(\text{NNN})(25)+19a, v(\text{CC})(15)$                                          |
| 32 | 1407 | 1368 | 1372 | 12 | 46 | 1381.9 m  | 1362.6 vw | $v(\text{C4N})(28)+v(\text{NNN})(22)+\delta(\text{COO})(18)$                     | --   | --   | --   | -- | -- | --        | --        | --                                                                                                   |
| 33 | 1389 | 1351 | 1354 | 2  | 0  | 1357.8 vw | 1357.8 vw | $v(\text{C9N})(32)+\delta(\text{COO})(25)+\delta_s(\text{pyrrol})(23)$           | 1400 | 1361 | 1365 | 19 | 7  | 1367.4 m  | 1372.2 vs | $\gamma_s(\text{C-H})$ in-phase in pyrrolidine (87)                                                  |
| 34 | 1386 | 1348 | 1351 | 8  | 5  | 1348.2 vw | 1349.1 vw | $\gamma_s(\text{C-H})$ in pyrrol (65)+ $v(\text{C-OH})(15)$                      | 1391 | 1352 | 1356 | 8  | 0  | 1346.2 m  | 1356.8 w  | $v_s(\text{NNN})(38)+\gamma_s(\text{C-H})$ in pyrrol(30)+ $v(\text{C8C})(25)$                        |
| 35 | 1379 | 1341 | 1345 | 9  | 6  | 1333.7 m  | 1343.3 vw | $14, v(\text{CC})$ aryl (60) + $v_s(\text{NNN})(25)$                             | 1365 | 1328 | 1331 | 6  | 1  | 1339.5 m  | 1340.4 vw | $14, \delta(\text{CC})$ in aryl (82) + $\delta(\text{CH}_3)(16)$                                     |
| 36 | 1357 | 1320 | 1323 | 0  | 1  |           | 1331.7 w  | $\gamma_s(\text{C-H})$ in pyrrolidine (83)                                       | 1352 | 1315 | 1319 | 10 | 1  |           | 1326.0 vw | $v(\text{CN}, \text{CC})$ triazole(34) + $v_s(\text{COO})(28)+\gamma(\text{CH})$ pyrrol(25)          |
| 37 | 1344 | 1308 | 1311 | 1  | 3  |           | 1327.9 w  | $\gamma_{as}(\text{CH})$ pyrrolidi (48)+ $3, \delta(\text{CH})$ in aryl(38)      | 1346 | 1310 | 1313 | 14 | 1  |           | 1314.4 vw | $\gamma_{as}(\text{C-H})$ pyrrolidine (46) + $v_s(\text{COO})(37)$                                   |
|    | --   | --   | --   | -- | -- | --        | --        | --                                                                               | 1337 | 1301 | 1304 | 35 | 4  | 1299.9 m  | 1307.6 vw | $v_s(\text{COO})(34)+v(\text{triazole})(32)+\gamma(\text{CH})$ pyrrolid(18)                          |
| 38 | 1337 | 1301 | 1304 | 4  | 3  | 1299.0 m  | 1304.7 vw | $3, \delta(\text{CH})(50)+\gamma_s(\text{C-H})$ pyrrolidine (32)                 | 1332 | 1296 | 1299 | 1  | 0  |           | 1302.8 vw | $3, \delta(\text{CH})$ in aryl (65)+ $\gamma(\text{CH})$ pyrrolidine (16)                            |
| 39 | 1328 | 1292 | 1295 | 1  | 3  |           | 1297.0 vw | $\gamma_s(\text{C-H})$ in pyrrolidine (83)                                       | 1324 | 1289 | 1291 | 9  | 1  | 1280.7 m  | 1285.5 vw | $\gamma_s(\text{C-H})$ in-phase in pyrrolidine (93)                                                  |
| 40 | 1302 | 1268 | 1270 | 1  | 6  |           | 1275.8 w  | $v(\text{CN})$ triazol (56) + $3, \delta(\text{CH})$ aryl(23)                    | --   | --   | --   | -- | -- | --        | --        | --                                                                                                   |
| 41 | 1298 | 1264 | 1266 | 64 | 0  | 1274.9 s  | 1262.0 m  | $v(\text{C-O1})(65)+14, v(\text{CC})$ in aryl (22)                               | --   | --   | --   | -- | -- | --        | --        | --                                                                                                   |
| 42 | 1282 | 1249 | 1251 | 3  | 2  | 1265.2 s  | 1246.9 w  | $\gamma_{as}(\text{C-H})$ in pyrrolidine (78)                                    | 1283 | 1250 | 1252 | 9  | 2  | 1262.3 sh | 1260.4 vw | $\gamma_{as}(\text{C-H})$ in pyrrolidine (92)                                                        |
| 43 | 1269 | 1236 | 1238 | 13 | 2  | 1243.1 vs | 1243.0 w  | $\delta(\text{OH})(52)+v(\text{CN})(25)+\gamma_{as}(\text{C-H})(16)$             | 1276 | 1243 | 1245 | 79 | 1  | 1247.9 vs | 1251.7 vw | $7a, v(\text{COC})(62)+\delta(\text{CH})$ aryl(25)+ $\gamma_s(\text{CH}_3)(11)$                      |
| 44 | 1255 | 1223 | 1225 | 3  | 1  |           | 1222.8 vw | $\gamma_{as}(\text{C-H})$ in pyrrolidine (85)                                    | 1259 | 1227 | 1229 | 8  | 5  | 1217.0 vw | 1237.2 vw | $\delta(\text{NN})(37)+v(\text{CC11})(25)+\delta(\text{CC}, \text{CN})$ pyrrol(24)                   |
|    | --   | --   | --   | -- | -- | --        | --        | --                                                                               | 1241 | 1210 | 1211 | 0  | 1  |           | 1213.1vw  | $\gamma_{as}(\text{C-H})$ in pyrrolidine (92)                                                        |
| 45 | 1215 | 1185 | 1186 | 3  | 0  | 1194.8 s  | 1201.6 vw | $\gamma_{as}(\text{C-H})$ in pyrrolidine (88)                                    | 1238 | 1207 | 1208 | 9  | 1  |           | 1208.3vw  | $\delta(\text{triazole})(45)+\gamma(\text{CC}, \text{CH})$ pyrrolidi(25)+ $3, \delta(\text{CH})(13)$ |
|    | --   | --   | --   | -- | -- | --        | --        | --                                                                               | 1213 | 1183 | 1184 | 8  | 0  | 1184.2 m  |           | $\delta(\text{triazole})(73)+\gamma(\text{CC}, \text{CN})$ pyrrolidine(16)                           |
| 46 | 1212 | 1182 | 1183 | 2  | 1  | 1180.4 m  | 1182.3 w  | $\gamma_{as}(\text{C-H})$ in $\text{CH}_3$ (89)                                  | 1211 | 1181 | 1182 | 5  | 1  |           | 1180.4 m  | $\gamma_{as}(\text{C-H})$ in $\text{CH}_3$ (92)                                                      |
| 47 | 1207 | 1177 | 1178 | 5  | 1  | 1153.4 vs | 1175.5 sh | $\gamma_{as}(\text{C-H})$ pyrrolidin (82)+ $\delta(\text{O13H})(14)$             | 1203 | 1174 | 1174 | 8  | 1  | 1173.6 m  | 1175.5 m  | $\gamma_{as}(\text{C-H})$ pyrrolidine(68) + $\delta(\text{triazole})(15)$                            |
| 48 | 1197 | 1168 | 1169 | 8  | 7  | 1166.9 sh | 1168.8 m  | $9a, \delta(\text{C-H})$ in aryl (84)                                            | 1191 | 1162 | 1163 | 0  | 9  |           | 1167.8 w  | $9a, \delta(\text{C-H})$ in aryl (78)                                                                |
| 49 | 1185 | 1157 | 1157 | 5  | 2  |           | 1156.2 w  | $\gamma_{as}(\text{CH})$ pyrrolidin(65)+ $9a, \delta(\text{C-H})(23)$            | 1189 | 1160 | 1161 | 5  | 1  |           | 1164.0 vw | $\gamma_{as}(\text{C-H})$ pyrrolidine (62)+ $9a, \delta(\text{C-H})(28)$                             |
| 50 | 1178 | 1150 | 1150 | 0  | 0  |           |           | $\gamma_{as}(\text{C-H})$ in $\text{CH}_3$ (99)                                  | 1180 | 1152 | 1152 | 0  | 0  | 1152.4 w  | 1154.3 w  | $\gamma_{as}(\text{C-H})$ in $\text{CH}_3$ (92)                                                      |
| 51 | 1154 | 1127 | 1127 | 14 | 0  |           | 1140.8 w  | $v_s(\text{COOH})(45)+\delta_{as}(\text{CH})$ pyrrolidi (42)                     | 1149 | 1122 | 1122 | 1  | 0  | 1111.9 vw | 1123.5 m  | $\delta_{as}(\text{C-H})$ in pyrrolidine (93)                                                        |
| 52 | 1140 | 1114 | 1113 | 29 | 0  | 1122.5 m  | 1120.6 w  | $v_{as}(\text{COO})(33)+v_s(\text{NNN})(31)+15, \delta(\text{CH})(28)$           | --   | --   | --   | -- | -- | --        | --        | --                                                                                                   |
| 53 | 1136 | 1110 | 1109 | 10 | 1  | 1108.0 vw | 1106.1vw  | $15, \delta(\text{C-H})$ in aryl (68)+ $v_s(\text{COO})(15)$                     | 1128 | 1102 | 1102 | 1  | 0  | 1096.5 vw | 1099.4 w  | $15, \delta(\text{C-H})$ in aryl (96)                                                                |
| 54 | 1119 | 1094 | 1093 | 30 | 3  | 1093.6 m  | 1096.5 w  | $v_s(\text{COO})(45)+\delta(\text{NNN})(38)$                                     | 1107 | 1082 | 1081 | 3  | 3  |           |           | $18b, \delta(\text{CH})$ in aryl (43) + $v(\text{triazole})(40)$                                     |
| 55 | 1075 | 1052 | 1050 | 12 | 0  |           |           | $v(\text{O1-CH}_3)(83)$                                                          | 1085 | 1061 | 1060 | 10 | 4  |           | 1063.7 w  | $v_{as}(\text{COC})(62)+15, \delta(\text{CH})(17)+\gamma_s(\text{CH}_3)(15)$                         |
| 56 | 1061 | 1039 | 1037 | 1  | 1  | 1031.9 m  | 1044.4 vw | $\gamma_s(\text{CC}, \text{CH})$ in pyrrolidine (82)                             | 1056 | 1034 | 1032 | 1  | 1  | 1030.9 m  | 1047.3 w  | $\gamma_s(\text{CC}, \text{C-H})$ in pyrrolidine (82)                                                |
| 57 | 1027 | 1006 | 1004 | 0  | 1  | 1006.7 vw | 1010.6 vw | $18a, \delta(\text{CH}, \text{CC})$ in aryl (88)                                 | 1024 | 1003 | 1001 | 0  | 1  | 1008.7 vw | 1010.6 w  | $18a, \delta(\text{CC}, \text{CH})$ in aryl (96)                                                     |
| 58 | 995  | 980  | 973  | 5  | 9  | 973.0 s   | 972.1 s   | $v_{as}(\text{NNN})(42)+\delta(\text{CN14})(24)+\gamma(\text{CC})$ pyrrol(22)    | 994  | 975  | 972  | 1  | 2  | 973.0 m   | 975.0 vs  | $v_{as}(\text{NNN})(32)+\delta(\text{CN14})(29)+\delta(\text{CC})$ pyrrol(25)                        |
| 59 | 990  | 975  | 968  | 7  | 11 |           | 965.3 m   | $v_s(\text{NNN})(38)+12, \delta(\text{CC})(34)+\delta(\text{CC}, \text{CN})(24)$ | 985  | 966  | 963  | 5  | 1  |           | 962.4 w   | $\gamma(\text{C-H})$ in pyrrolidine (96)                                                             |
| 60 | 979  | 964  | 957  | 0  | 2  |           |           | $\delta(\text{CC}, \text{CN})$ in pyrrol(58)+ $v_s(\text{NNN})(36)$              | --   | --   | --   | -- | -- | --        | --        | --                                                                                                   |
| 61 | 971  | 956  | 949  | 0  | 0  |           | 948.0vw   | $17a, \gamma(\text{C-H})$ in aryl (99)                                           | 959  | 942  | 938  | 0  | 0  |           | 945.1 vw  | $17a, \gamma(\text{C-H})$ in aryl (100)                                                              |
| 62 | 960  | 945  | 939  | 0  | 0  | 939.3 m   | 937.4 vw  | $5, \gamma(\text{C-H})$ in aryl (100)                                            | 953  | 936  | 932  | 5  | 1  | 933.4 vw  | 927.7 vw  | $5, \gamma(\text{C-H})$ in aryl (100)                                                                |
| 63 | 938  | 923  | 917  | 1  | 0  | 925.8 vw  | 925.8 vw  | $\gamma_{as}(\text{C-H})$ in pyrrolidine (98)                                    | 953  | 936  | 932  | 32 | 6  |           |           | $v_s(\text{NNN})(44)+v(\text{C8C})(20)+10b, \gamma(\text{CH})(18)$                                   |
| 64 | 923  | 908  | 902  | 1  | 1  | 917.1 m   | 917.1 w   | $\gamma_{as}(\text{CC}, \text{CH})$ in pyrrolidine (97)                          | 943  | 926  | 922  | 6  | 1  | 916.1 vw  | 915.2 vw  | $\gamma_{as}(\text{C-H})$ in pyrrolidine (99)                                                        |
| 65 | 890  | 875  | 870  | 0  | 1  | 860.2 w   | 860.2 w   | $\gamma_s(\text{CC}, \text{CH})$ in pyrrolidine (93)                             | 916  | 901  | 896  | 1  | 1  |           | 907.5 w   | $\gamma_s(\text{C-H})$ in pyrrolidine (100)                                                          |
| 66 | 858  | 843  | 839  | 0  | 0  |           | 845.8 vw  | $\gamma_{as}(\text{CC}, \text{CH})$ in pyrrolidine (87)                          | 895  | 881  | 875  | 1  | 0  |           | 867.0 w   | $\gamma_{as}(\text{C-H})$ in pyrrolidine (100)                                                       |
| 67 | 852  | 837  | 833  | 9  | 0  | 835.1 m   | 827.4 w   | $17b, \gamma(\text{C-H})$ in aryl (98)                                           | 843  | 831  | 825  | 9  | 0  | 835.1 m   | 821.7 w   | $17b, \gamma(\text{C-H})$ in aryl (100)                                                              |
|    | --   | --   | --   | -- | -- | --        | --        | --                                                                               | 843  | 831  | 825  | 1  | 0  | 820.7 m   | 816.8 w   | $\delta_{as}(\text{C-H})$ in pyrrolidine (99)                                                        |
| 68 | 825  | 810  | 807  | 1  | 0  | 824.5vs   | 813.0 w   | $10a, \gamma(\text{C-H})$ in aryl (97)                                           | 821  | 810  | 803  | 1  | 0  | 814.9 m   | 801.4 m   | $10a, \gamma(\text{C-H})$ in aryl (100)                                                              |
| 69 | 820  | 805  | 802  | 0  | 1  | 799.4 m   | 800.4 w   | $6a, \delta(\text{CC})$ aryl (51) + $\delta_s(\text{CO1C})(25)$                  | 815  | 805  | 797  | 1  | 4  | 800.4 w   | 797.5 m   | $6a, \delta(\text{CC})(56)+\gamma(\text{CH}_3)(25)+\delta(\text{CH})$ pyrroli (18)                   |
| 70 | 787  | 772  | 770  | 5  | 0  | 779.2 vs  | 768.0 m   | $\delta(\text{CCOO})(67)+\gamma(\text{C8C})(22)$                                 | 808  | 798  | 790  | 1  | 1  |           | 783.1 vw  | $\gamma_s(\text{CCOO})(55)+\gamma(\text{C8C})(30)+6a, \delta(\text{CC})(27)$                         |

|     |     |     |     |    |    |           |                |                                                                                          |     |     |     |    |    |           |          |                                                                                      |
|-----|-----|-----|-----|----|----|-----------|----------------|------------------------------------------------------------------------------------------|-----|-----|-----|----|----|-----------|----------|--------------------------------------------------------------------------------------|
| 71  | --  | --  | --  | -- | -- | 732.9 m   | 735.8 vw       | --                                                                                       | 795 | 786 | 778 | 25 | 1  |           | 774.4 w  | $\delta_{as}(\text{COO})$ (58) + $\delta_{as}(\text{C-H})$ pyrrolidine (15)          |
| 72  | 762 | 747 | 745 | 4  | 1  | 707.8 vvw | 705.9 w        | $\delta(\text{CC}, \text{CH})$ in pyrrol(70) + $\delta(\text{CCOO})$ (17)                | 762 | 754 | 745 | 4  | 0  | 737.7 vvw | 730.0 w  | $\delta(\text{CC})$ in pyrrolidine (65) + $\delta_s(\text{COO})$ (25)                |
| 73  | 721 | 706 | 705 | 9  | 1  |           |                | $\gamma(\text{COOH})(62) + \gamma(\text{NC}_8\text{C})(21) + \gamma(\text{CN}_{14})(16)$ | 722 | 716 | 706 | 0  | 0  | 706.9 vw  | 707.9 w  | $\gamma(\text{NC}_8\text{CN}_{10})$ (53) + $\gamma_s(\text{COO})$ (38)               |
| 74  | 716 | 701 | 701 | 0  | 0  |           |                | 10b, $\gamma(\text{CC}, \text{CH})$ in aryl (97)                                         | 710 | 705 | 695 | 0  | 0  | 660.6 w   | 671.2 vw | 10b, $\gamma(\text{CC}, \text{CH})$ in aryl (99)                                     |
| 75  | 714 | 699 | 699 | 9  | 0  | 697.2 w   | 696.3w, 686.7w | $\delta(\text{COOH})$ (46) + $\gamma(\text{triazole})$ (38)                              | --  | --  | --  | -- | -- | --        | --       | --                                                                                   |
| 76  | 672 | 657 | 657 | 4  | 0  | 664.4 m   | 662.5 vw       | $\gamma_s(\text{triazole})$ (78) + $\gamma(\text{O}_{13}\text{-H})$ (15)                 | --  | --  | --  | -- | -- | --        | --       | --                                                                                   |
| 77  | 661 | 646 | 647 | 4  | 0  | 647.1 sh  | 651.0 w        | 6a, $\delta(\text{CC})$ (38) + $\Gamma(\text{triazole})$ (32)                            | 661 | 658 | 647 | 11 | 1  | 648.0 w   | 642.3 vw | 6a, $\delta(\text{CC})(65) + \delta(\text{NNN})(15) + \delta(\text{OCH}_3)(12)$      |
| 78  | 652 | 637 | 638 | 3  | 1  | 638.4 vs  | 639.2 m        | 6b, $\delta(\text{CC})$ (42) + $\delta(\text{triazole})$ (24)                            | 646 | 644 | 632 | 2  | 1  | 639.4 m   | 637.5 w  | 6b, $\delta(\text{CC})$ in aryl (68) + $\delta(\text{NNN})(15)$                      |
| 79  | 640 | 625 | 626 | 4  | 1  | 614.3 vvw | 631.7 m        | $\Gamma(\text{triazole})(34) + 6b, \delta(\text{CC})$ in aryl(33)                        | 638 | 636 | 624 | 2  | 0  | 627.8 w   | 627.8 w  | $\Gamma(\text{triazole})$ (38) + $\delta(\text{CC})$ in aryl (25)                    |
| 80  | 591 | 576 | 578 | 11 | 1  |           | 570.9 w        | $\gamma(\text{O}_{13}\text{-H})$ (81)                                                    | 610 | 610 | 597 | 1  | 0  | 613.3 vvw | 607.6 w  | $\gamma_s(\text{NNN})$ (55) + $\gamma(\text{COO})$ (18)                              |
| 81  | 584 | 569 | 571 | 1  | 0  |           | 561.3 w        | $\delta(\text{CC}, \text{CH})$ in pyrrolidine (94)                                       | 595 | 595 | 582 | 0  | 0  |           |          | $\delta_{as}(\text{CC}, \text{C-H})$ in pyrrolidine (100)                            |
| 82  | --  | --  | --  | -- | -- |           | --             | --                                                                                       | --  | --  | --  | -- | -- |           |          | --                                                                                   |
| 83  | 536 | 520 | 524 | 1  | 1  | 534.6 m   | 534.6 m        | 16b, $\gamma(\text{CC})(45) + \delta(\text{COC})(18) + \delta(\text{triazole})(24)$      | 529 | 533 | 517 | 1  | 0  |           |          | 16b, $\gamma(\text{CC}, \text{CH})$ in aryl (86)                                     |
| 84  | 534 | 518 | 522 | 2  | 0  | 502.5 w   | 502.5 w        | 6b, $\delta(\text{CC})$ (38) + $\delta(\text{COC})(26) + \delta(\text{COO})(22)$         | 525 | 529 | 513 | 0  | 0  |           |          | 6b, $\delta(\text{CC})(38) + \delta(\text{triazole})(32) + \delta(\text{OCH}_3)(18)$ |
| 85  | 491 | 475 | 480 | 1  | 0  | 467.8 vw  | 467.8 vw       | $\delta(\text{triazole})$ (34) + 6b, $\delta(\text{CC})$ (30) + $\delta(\text{COO})(24)$ | 488 | 494 | 477 | 2  | 0  |           |          | $\delta(\text{triazole})(42) + 6b, \delta(\text{CC})(22) + \delta(\text{COO})(17)$   |
| 86  | 456 | 440 | 446 | 0  | 0  |           |                | 16a, $\gamma(\text{CC})$ (28) + $\delta(\text{COC})(26) + \delta(\text{triazole})(24)$   | 442 | 450 | 432 | 0  | 0  |           |          | 16a, $\gamma(\text{CC})(46) + \delta(\text{triazole})(30) + \delta(\text{COO})$ (12) |
| 87  | 425 | 409 | 415 | 0  | 0  | 409.9 w   | 409.9 w        | 4, $\gamma(\text{CC})$ in aryl (85)                                                      | 427 | 436 | 417 | 0  | 0  |           |          | 4, $\gamma(\text{CC})$ in aryl (95)                                                  |
| 88  | 411 | 395 | 401 | 0  | 0  | 403.2 w   | 403.2 w        | $\Gamma(\text{CC})$ aryl(32) + $\delta(\text{triazole})(28) + \delta(\text{COC})(26)$    | 397 | 407 | 388 | 1  | 0  |           |          |                                                                                      |
| 89  | --  | --  | --  | -- | -- | 389.7 vw  | 389.7 vw       |                                                                                          | --  | --  | --  | -- | -- |           |          |                                                                                      |
| 90  | 351 | 335 | 342 | 1  | 0  | 361.7 m   | 361.7 m        |                                                                                          | 367 | 379 | 358 | 0  | 0  |           |          |                                                                                      |
| 91  | 340 | 324 | 332 | 0  | 0  | 355.9 m   | 355.9 m        |                                                                                          | 331 | 344 | 323 | 0  | 0  |           |          |                                                                                      |
| 92  | 332 | 316 | 324 | 1  | 0  | 327.0 vw  | 327.0 vw       |                                                                                          | 321 | 335 | 313 | 0  | 0  |           |          |                                                                                      |
| 93  | 282 | 266 | 274 | 0  | 0  | 310.6 vw  | 310.6 vw       |                                                                                          | 281 | 297 | 274 | 1  | 0  |           |          |                                                                                      |
| 94  | 259 | 243 | 252 | 1  | 0  | 270.1 vw  | 270.1 vw       |                                                                                          | 272 | 288 | 265 | 1  | 0  |           |          |                                                                                      |
| 95  | 249 | 233 | 242 | 0  | 0  |           | 237.3 vw       |                                                                                          | 256 | 273 | 249 | 0  | 0  |           |          |                                                                                      |
| 96  | 230 | 214 | 223 | 0  | 0  |           | 215.1 vw       |                                                                                          | 227 | 246 | 220 | 0  | 1  |           |          |                                                                                      |
| 97  | 206 | 190 | 200 | 0  | 0  |           | 209.3 vw       |                                                                                          | 198 | 218 | 192 | 2  | 0  |           |          |                                                                                      |
| 98  | 189 | 173 | 183 | 0  | 0  |           | 184.3 vw       |                                                                                          | 186 | 207 | 180 | 1  | 0  |           |          |                                                                                      |
| 99  | 171 | 155 | 165 | 0  | 0  |           | 145.7 vw       |                                                                                          | 165 | 187 | 159 | 1  | 0  |           |          |                                                                                      |
| 100 | 153 | 137 | 147 | 0  | 0  |           | 122.6 vw       |                                                                                          | 151 | 173 | 145 | 0  | 0  |           |          |                                                                                      |
| 101 | 145 | 129 | 139 | 1  | 0  |           |                |                                                                                          | 120 | 144 | 115 | 1  | 1  |           |          |                                                                                      |
| 102 | 97  | 81  | 92  | 0  | 0  |           |                |                                                                                          | 89  | 114 | 84  | 1  | 0  |           |          |                                                                                      |
| 103 | 71  | 55  | 66  | 0  | 0  |           |                |                                                                                          | 72  | 98  | 67  | 0  | 0  |           |          |                                                                                      |
| 104 | 66  | 50  | 61  | 0  | 0  |           |                |                                                                                          | 64  | 91  | 59  | 1  | 0  |           |          |                                                                                      |
| 105 | 46  | 30  | 41  | 0  | 0  |           |                |                                                                                          | 61  | 88  | 56  | 0  | 0  |           |          |                                                                                      |
| 106 | 44  | 28  | 39  | 0  | 0  |           |                |                                                                                          | 45  | 72  | 40  | 0  | 0  |           |          |                                                                                      |
| 107 | 37  | 21  | 32  | 0  | 0  |           |                |                                                                                          | 36  | 64  | 31  | 0  | 0  |           |          |                                                                                      |
| 108 | 25  | 9   | 21  | 0  | 0  |           |                |                                                                                          | 29  | 57  | 25  | 0  | 0  |           |          |                                                                                      |

\*Assigned to the dimer form. <sup>†</sup>Observed frequencies characterized by notation: vs= very strong, s= strong, m= medium, ms= medium strong, w=weak band, vw= very weak, vvw= very very weak, sh= shoulder.  $\nu_{as}$ : anti-symmetric stretching,  $\nu_s$ : symmetric stretching,  $\delta$ : in-plane bending,  $\gamma$ : out-of-plane bending,  $\beta$ : scissoring,  $\rho$ : rocking,  $\omega$ : wagging,  $\tau$ : torsion

**Table S3-SUP.** Calculated harmonic wavenumbers ( $\nu$ ,  $\text{cm}^{-1}$ ), relative infrared intensities (A, %), relative Raman intensities (S, %) together with the scaled values ( $\nu$ ,  $\text{cm}^{-1}$ ) in the COOH (**1a**) and COO groups (**2a**).

| Group |                      |                    |     |     | TLSE                | PSE                 |           |           |                                                                                                     |
|-------|----------------------|--------------------|-----|-----|---------------------|---------------------|-----------|-----------|-----------------------------------------------------------------------------------------------------|
|       |                      | $\nu^{\text{cal}}$ | A   | S   | $\nu^{\text{scal}}$ | $\nu^{\text{scal}}$ | IR        | Raman     | Characterization                                                                                    |
| COOH  | $\nu(\text{O-H})$    | 3762               | 15  | 17  | 3607                | 3592                | 3596.1 w  | 3504.2 vw | $\nu(\text{O-H})$ (100)                                                                             |
|       |                      | 3161               | 100 | 0   | 3035                | 3035                | 3491.0 w  |           | Dimer: $\nu(\text{O-H})$ out-of-phase                                                               |
|       |                      | 3062               | 0   | 100 | 2941                | 2943                |           |           | Dimer: $\nu(\text{O-H})$ in-phase                                                                   |
|       | $\delta(\text{O-H})$ | 1269               | 13  | 2   | 1236                | 1238                | 1243.1 vs | 1243.0 w  | $\delta(\text{O-H})(52) + \nu(\text{CN})(25) + \gamma_{\text{as}}(\text{CH})$ in pyrrolidine (16)   |
|       |                      | 591                | 11  | 1   | 576                 | 578                 |           |           | $\gamma(\text{O-H})$ (81)                                                                           |
|       |                      | 1015               | 3   | 0   | 1001                | 998                 |           |           | Dimer: $\gamma(\text{O-H})$ in-phase                                                                |
|       | $\gamma(\text{O-H})$ | 964                | 0   | 0   | 949                 | 942                 |           | 570.9 w   | Dimer: $\gamma(\text{O-H})$ out-of-phase                                                            |
|       |                      | 1796               | 97  | 18  | 1738                | 1745                | 1675.1 vs | 1643.2 m  | $\nu(\text{C=O})$ (92)                                                                              |
|       |                      | 1743               | 80  | 0   | 1687                | 1695                |           |           | Dimer: $\nu(\text{C=O})$ out-of-phase                                                               |
|       |                      | 1702               | 0   | 70  | 1648                | 1655                |           |           | Dimer: $\nu(\text{C=O})$ in-phase                                                                   |
| COOH  | $\nu(\text{C-O})$    | 1140               | 29  | 0   | 1114                | 1113                | 1122.5 m  | 1120.6 w  | $\nu_{\text{as}}(\text{COO})(33) + \nu_{\text{s}}(\text{NNN})(31) + 15, \delta(\text{CH})(28)$      |
|       |                      | 1286               | 0   | 1   | 1253                | 1255                |           |           | Dimer: $\nu_{\text{as}}(\text{COO})$ in-phase                                                       |
|       |                      | 1285               | 2   | 0   | 1252                | 1254                |           |           | Dimer: $\nu_{\text{as}}(\text{COO})$ out-of-phase                                                   |
|       |                      | 1119               | 30  | 3   | 1094                | 1093                | 1093.6 m  | 1096.5 w  | $\nu_{\text{s}}(\text{COO})$ (45) + $\delta(\text{NNN})$ (38)                                       |
|       |                      | 821                | 1   | 0   | 806                 | 803                 |           |           | Dimer: $\delta_{\text{as}}(\text{COO})$ out-of-phase                                                |
|       |                      | 809                | 0   | 1   | 794                 | 791                 |           |           | Dimer: $\delta_{\text{as}}(\text{COO})$ in-phase                                                    |
|       |                      | 714                | 9   | 0   | 699                 | 699                 | 697.2 w   | 696.3 w   | $\delta(\text{COOH})$ (46) + $\gamma(\text{triazole})$ (38)                                         |
|       | $\delta(\text{C=O})$ | 796                | 15  | 0   | 782                 | 780                 | 779.2 vs  |           | Dimer: $\delta(\text{COOH})$ out-of-phase + $\nu(\text{CC})$                                        |
|       |                      | 777                | 0   | 8   | 763                 | 761                 |           | 768.0 m   | Dimer: $\delta(\text{COOH})$ in-phase                                                               |
|       |                      | 721                | 9   | 1   | 706                 | 705                 | 707.8 vvw | 705.9 w   | $\gamma(\text{COOH})(62) + \gamma(\text{NC}_8\text{C})(21) + \gamma(\text{CN}_{14})(16)$            |
|       | $\gamma(\text{C=O})$ | 714                | 0   | 0   | 699                 | 699                 |           |           | Dimer: $\gamma(\text{C=O})$ out-of-phase                                                            |
|       |                      | 712                | 0   | 0   | 697                 | 697                 |           |           | Dimer: $\gamma(\text{C=O})$ in-phase                                                                |
| COO   | $\nu_{\text{as}}$    | 1759               | 83  | 2   | 1702                | 1710                | 1588.3 vs | 1629.7 vw | $\nu_{\text{as}}(\text{COO})$ (96)                                                                  |
|       | $\nu_{\text{s}}$     | 1337               | 35  | 4   | 1301                | 1304                | 1299.9 m  | 1307.6 vw | $\nu_{\text{s}}(\text{COO})(34) + \nu(\text{triazole})(32) + \gamma(\text{CH})$ in pyrrolidine (18) |
|       | $\delta_{\text{as}}$ | 795                | 25  | 1   | 786                 | 778                 |           | 774.4 w   | $\delta_{\text{as}}(\text{COO})(58) + \delta_{\text{as}}(\text{C-H})$ in pyrrolidine (15)           |
|       | $\gamma_{\text{s}}$  | 808                | 1   | 1   | 798                 | 790                 |           | 783.1 vw  | $\gamma_{\text{s}}(\text{CCOO})(55) + \gamma(\text{C}_8\text{C})(30) + 6a, \delta(\text{CC})$ (27)  |
